# Supplementary material
Source: publisher figshare collection journal article supplement (https://acs.figshare.com/ndownloader/files/22908884)
Supplement: Supplementary file 1 [file 22908884]

# **Supporting Information**

## **Outstanding performance of magnetically separable sulfureted MoO<sub>3</sub>/Fe-Ti spinel for gaseous Hg<sup>0</sup> recovery from smelting flue gas: Mechanism and adsorption kinetics**

Chang Wang, Xufan Zhang, Jian Mei, Qixing Hu, Shijian Yang \*

*School of Environment and Civil Engineering, Jiangnan University, Wuxi 214122, P. R. China*

Corresponding Author:

\* School of Environment and Civil Engineering, Jiangnan University. Telephone: 86-18-066068302;

E-mail: yangshijiangsq@163.com.

Content including: eight pages, one table and five figures.

## 1. XRD and BET

X-ray diffraction (XRD) patterns and Brunauer–Emmett–Teller (BET) surface areas were measured using an AXS D8 Advance X-ray diffractometer of Bruker and an Autosorb-1 nitrogen adsorption apparatus of Quantachrome, respectively.

Fe-Ti spinel's XRD pattern corresponded well to  $\gamma$ -Fe<sub>2</sub>O<sub>3</sub> (JCPDS: 39-1346), and there were hardly any other peaks assigned to other iron oxides and TiO<sub>2</sub> (Figure S4). This suggests that the synthetic Fe-Ti spinel presented a spinel structure. After MoO<sub>3</sub> loading, its XRD pattern did not vary, and no peaks corresponding to any molybdenum oxide can be observed. This suggests that the spinel structure was not destroyed and that the molybdenum oxides may be well dispersed on the Fe-Ti spinel. The XRD patterns of the sulfureted MoO<sub>3</sub>/Fe-Ti spinel and the sulfureted Fe-Ti spinel were the same as that of the Fe-Ti spinel (Figure S4). This suggests that the spinel structures of both the Fe-Ti spinel and MoO<sub>3</sub>/Fe-Ti spinel were hardly destroyed and that the sulfuration reaction may only happen on the surface. Figure S4 also shows that the XRD pattern of the MoO<sub>3</sub>/Fe-Ti spinel after five cycles was consistent with the fresh MoO<sub>3</sub>/Fe-Ti spinel, suggesting that the magnetic spinel structure was not destroyed after the multiple cycles.

The BET surface areas of the Fe-Ti spinel, MoO<sub>3</sub>/Fe-Ti spinel, sulfureted Fe-Ti spinel, and sulfureted MoO<sub>3</sub>/Fe-Ti spinel were 47.1, 39.1, 41.2, and 38.7 m<sup>2</sup> g<sup>-1</sup>, respectively.

**Table S1** The average rates of Hg<sup>0</sup> captured by the sulfureted MoO<sub>3</sub>/Fe-Ti spinel and sulfureted Fe-Ti spinel in 180 min /μg g<sup>-1</sup>

| m | i | n                                                                                   | -     | 1     |       |        |
|---|---|-------------------------------------------------------------------------------------|-------|-------|-------|--------|
|   |   |                                                                                     | 40 °C | 60 °C | 80 °C | 100 °C |
|   |   | sulfureted Fe-Ti spinel                                                             | 23.9  | 43.9  | 48.3  | 46.7   |
|   |   | sulfureted MoO <sub>3</sub> /Fe-Ti spinel                                           | 87.2  | 93.3  | 88.9  | 78.9   |
|   |   | sulfureted MoO <sub>3</sub> /Fe-Ti spinel with O <sub>2</sub>                       | 85.0  | 92.2  | 88.3  | 78.3   |
|   |   | sulfureted MoO <sub>3</sub> /Fe-Ti spinel with SO <sub>2</sub> and H <sub>2</sub> O | 82.8  | 86.7  | 78.9  | 67.8   |

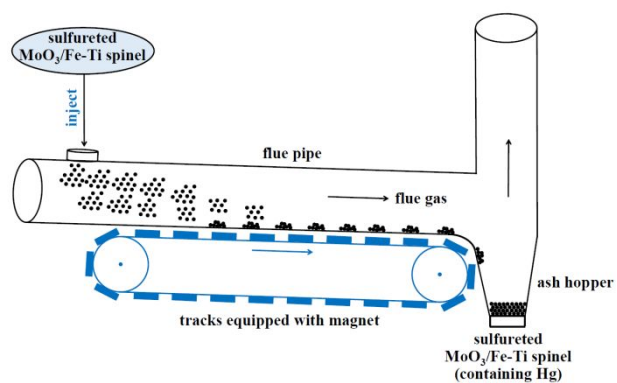

**Figure S1** Schematic diagram of magnetic separation of the sulfured MoO<sub>3</sub>/Fe-Ti spinel from smelting flue gas

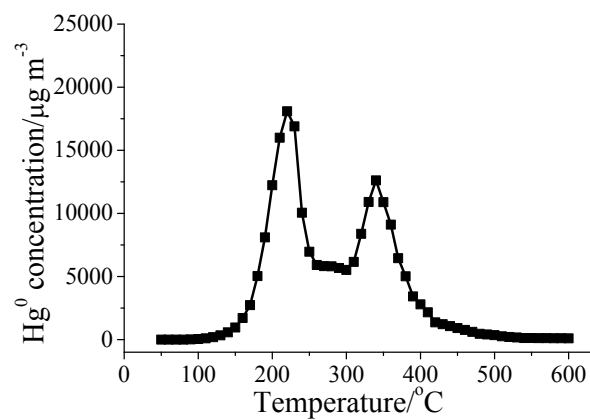

a

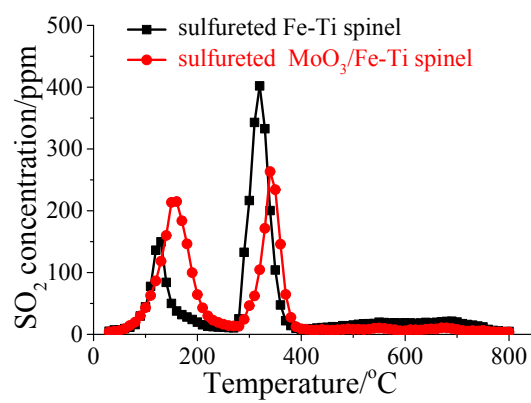

b

**Figure S2** (a), Hg-TPD profiles air of the sulfureted  $\text{MoO}_3/\text{Fe-Ti}$  spinel after  $\text{Hg}^0$  capture; (b),  $\text{SO}_2$ -TPO profiles of the sulfureted Fe-Ti spinel and sulfureted  $\text{MoO}_3/\text{Fe-Ti}$  spinel.

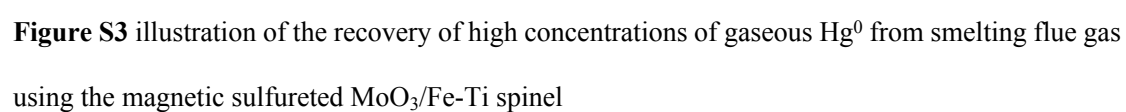

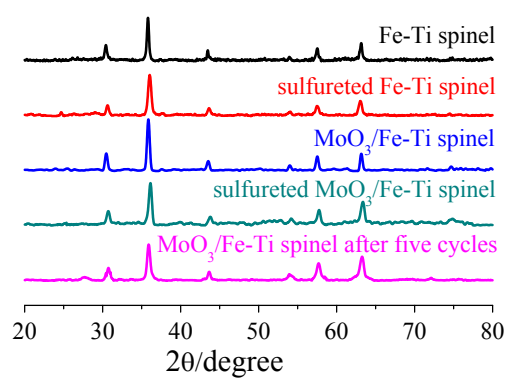

**Figure S4** XRD patterns of the Fe-Ti spinel, sulfureted Fe-Ti spinel, MoO<sub>3</sub>/Fe-Ti spinel, sulfureted MoO<sub>3</sub>/Fe-Ti spinel and MoO<sub>3</sub>/Fe-Ti spinel after five cycles.

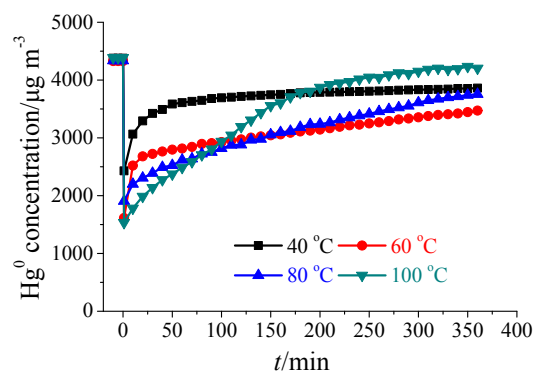

a

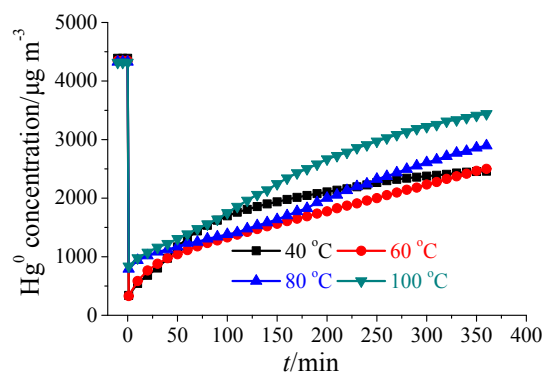

b

**Figure S5** Breakthrough curves of gaseous  $\text{Hg}^0$  adsorption onto: (a), the sulfured Fe-Ti spinel; (b), sulfured  $\text{MoO}_3/\text{Fe-Ti}$  spinel. Reaction conditions:  $[\text{Hg}^0] = 4300 \mu\text{g m}^{-3}$ , sorbent mass = 10 mg, total flow rate of  $\text{N}_2 = 300 \text{ mL min}^{-1}$ , and  $\text{GHSV} = 1,800,000 \text{ cm}^3 \text{ g}^{-1} \text{ h}^{-1}$ .
